# Supplementary material for: The Holocene evolution of the fluvial system of the southern Hessische Ried (Upper Rhine Graben, Germany) and its role for the use of the river Landgraben as a waterway during Roman times
Source: Copernicus journal article supplement (doi:10.5194/egqsj-73-179-2024), 2024-10-16
Supplement: Supplementary file 1 [file egqsj-73-179-2024-supplement.pdf]

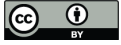

*Supplement of*

**The Holocene evolution of the fluvial system of the southern Hessische Ried (Upper Rhine Graben, Germany) and its role for the use of the river Landgraben as a waterway during Roman times**

**Elena Appel et al.**

*Correspondence to:* Elena Appel (eappel02@uni-mainz.de) and Andreas Vött (voett@uni-mainz.de)

The copyright of individual parts of the supplement might differ from the article licence.

**Table S1: Coordinates, elevation of ground surface and coring depth of sediment cores presented in this paper.**

| <b>Core</b> | <b>UTM coordinates</b> | <b>Elevation (ground surface, m NHN)</b> | <b>Coring depth (m b.s.)</b> |
|-------------|------------------------|------------------------------------------|------------------------------|
| LOR 11A     | 32U 469080 5502204     | 92.89                                    | 3                            |
| LOR 8A      | 32U 469568 5502717     | 92.86                                    | 3                            |
| GERN 1A     | 32U 464071 5509889     | 89.73                                    | 6                            |
| HAE 1A      | 32U 469544 5510046     | 90.75                                    | 8                            |
| HAE 3A      | 32U 469563 5509987     | 90.86                                    | 6                            |

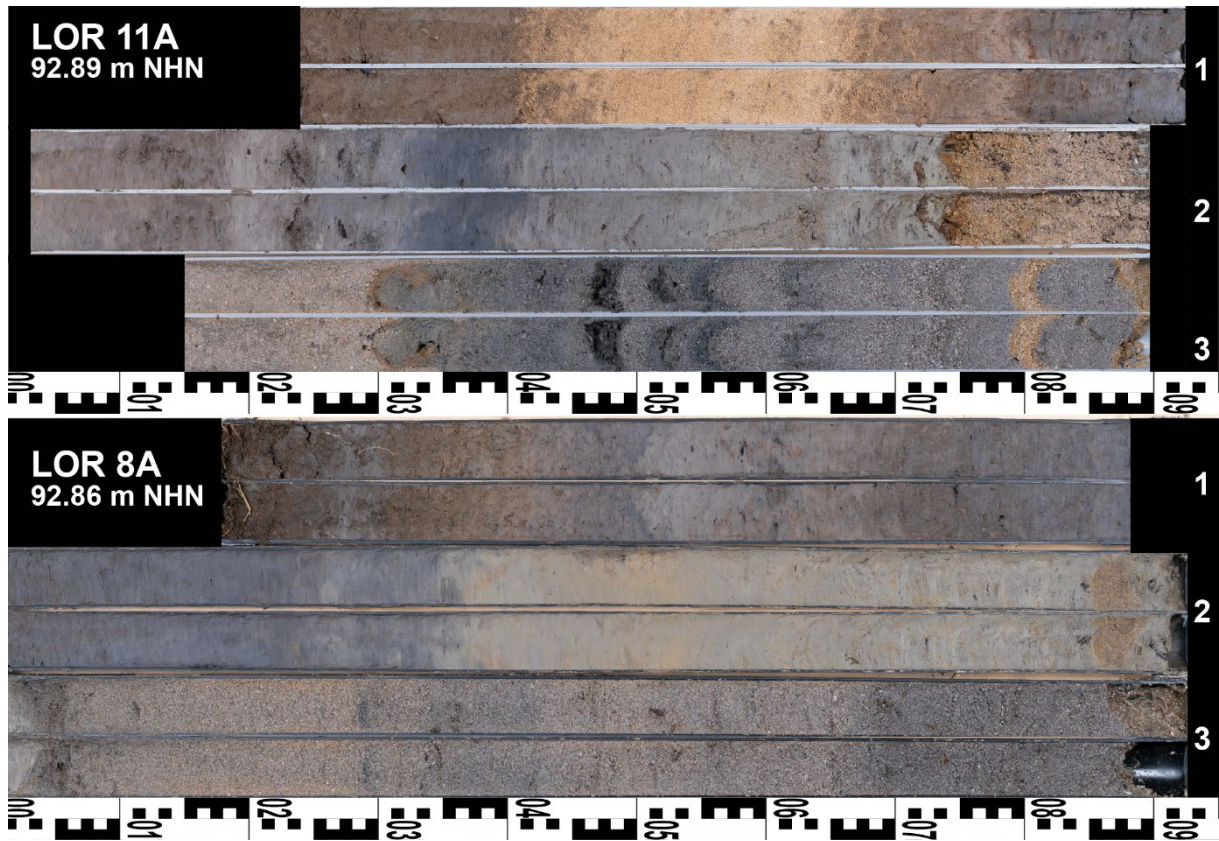

Figure S1: Photographs of sediment cores LOR 11A and LOR 8A drilled to a depth of 3 m each (ground surface to the upper left, final coring depth to the lower right).

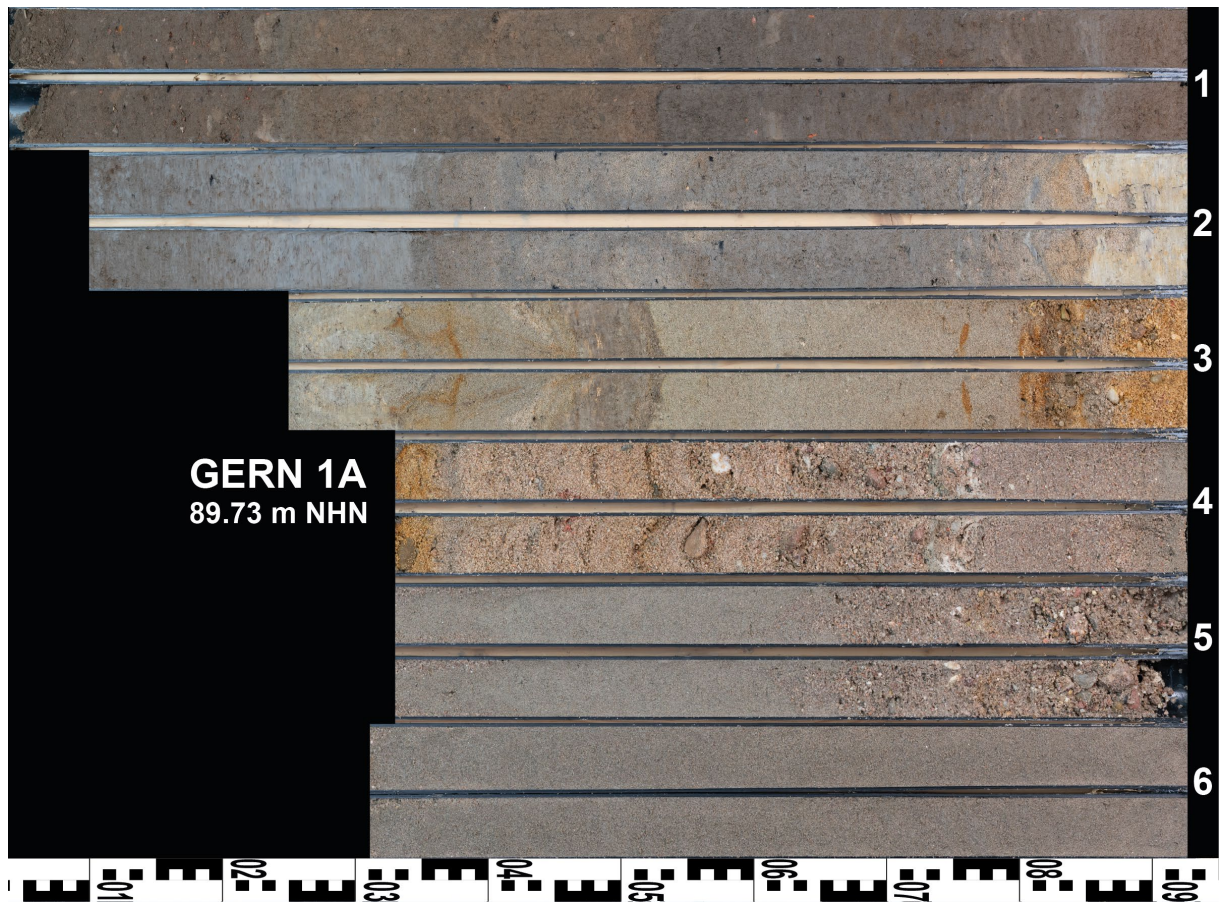

Figure S2: Photograph of sediment core GERN 1A reaching from the ground surface (upper left) down to a depth of 6 m (lower right).

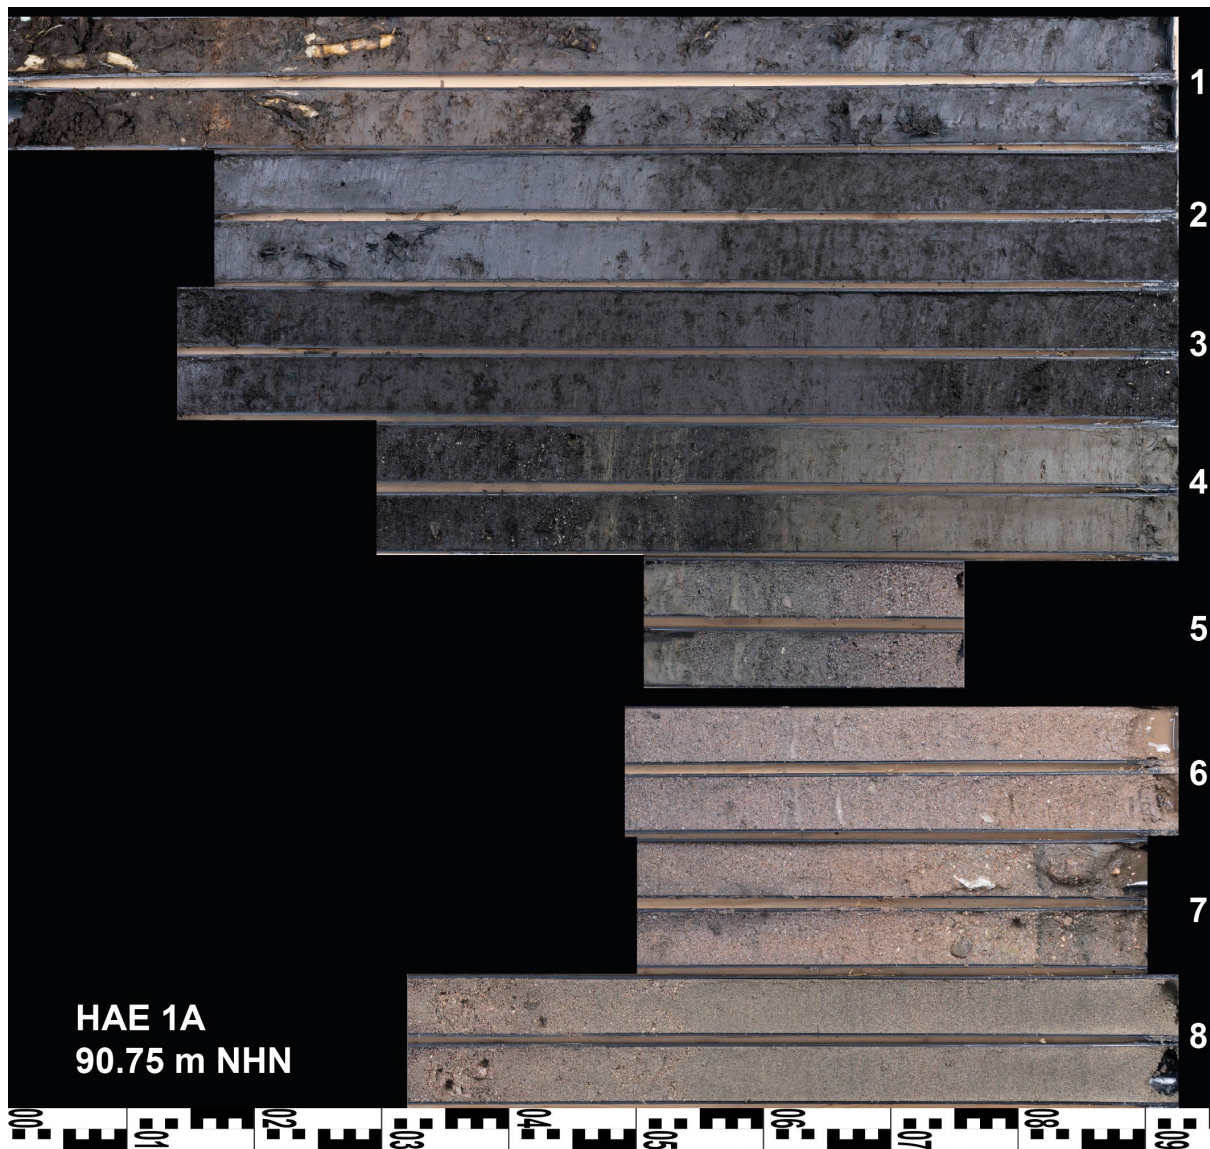

Figure S3: Photograph of sediment core HAE 1A reaching from the ground surface (upper left) down to a depth of 8 m (lower right).

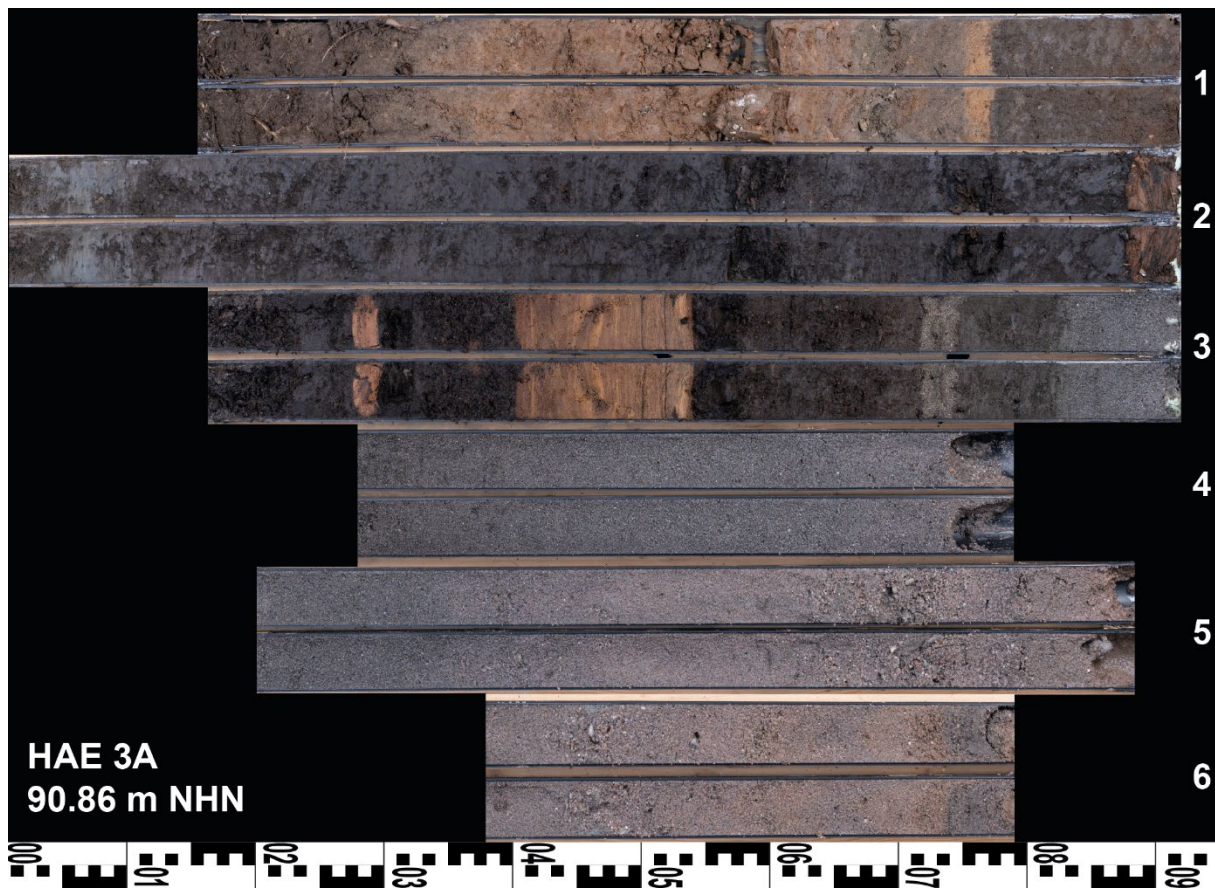

Figure S4: Photograph of sediment core HAE 3A reaching from the ground surface (upper left) down to a depth of 6 m (lower right).
